# Supplementary material for: Mapping the 12-item multiple sclerosis walking scale to the EuroQol 5-dimension index measure in North American multiple sclerosis patients
Source: HighWire-hosted journal article supplement (doi:10.1136/bmjopen-2013-002798), 2013-01-01
Supplement: bmjopen-2013-002798supp_appendix.pdf [file bmjopen-2013-002798supp_appendix.pdf]

## APPENDIX 1

The following example demonstrates how the MSWS-12 item scores for an individual patient can be used to estimate their EQ-5D score using the following mapping equation derived and validated in this study:

$$\text{EQ-5D} = +0.002* (\text{Item 1}), -0.009* (\text{Item 2}), -0.01* (\text{Item 3}), -0.029* (\text{Item 4}), -0.019* (\text{Item 5}), -0.0000881* (\text{Item 6}), -0.008* (\text{Item 7}), -0.002* (\text{Item 8}), +0.013* (\text{Item 9}), -0.011* (\text{Item 10}), +0.001* (\text{Item 11}), \text{ and } -0.008* (\text{Item 12}) +0.983 (\text{constant})$$

A North American patient with MS completes the MSWS-12 (total score of 63) and answers each of the 12-items in the following fashion:

| MSWS-12 Item | Response |
|--------------|----------|
| Item 1       | 4        |
| Item 2       | 5        |
| Item 3       | 4        |
| Item 4       | 3        |
| Item 5       | 3        |
| Item 6       | 3        |
| Item 7       | 2        |
| Item 8       | 3        |
| Item 9       | 4        |
| Item 10      | 3        |
| Item 11      | 4        |
| Item 12      | 4        |

Hence, the predicted EQ-5D value for this patient is:

$$+0.002* (4) -0.009* (5) -0.01* (4) -0.029* (3) -0.019* (3) -0.0000881* (3) -0.008* (2) -0.002* (3) +0.013* (4) -0.011* (3) +0.001* (4) -0.008* (4) +0.983 = \mathbf{0.73}$$
